# Supplementary material
Source: Springer Nature journal article supplement (https://www.springermedizin.de/resource/supplementary/13002_2008_130_MOESM2_ESM.pdf/9627220)

# Medicinal indications

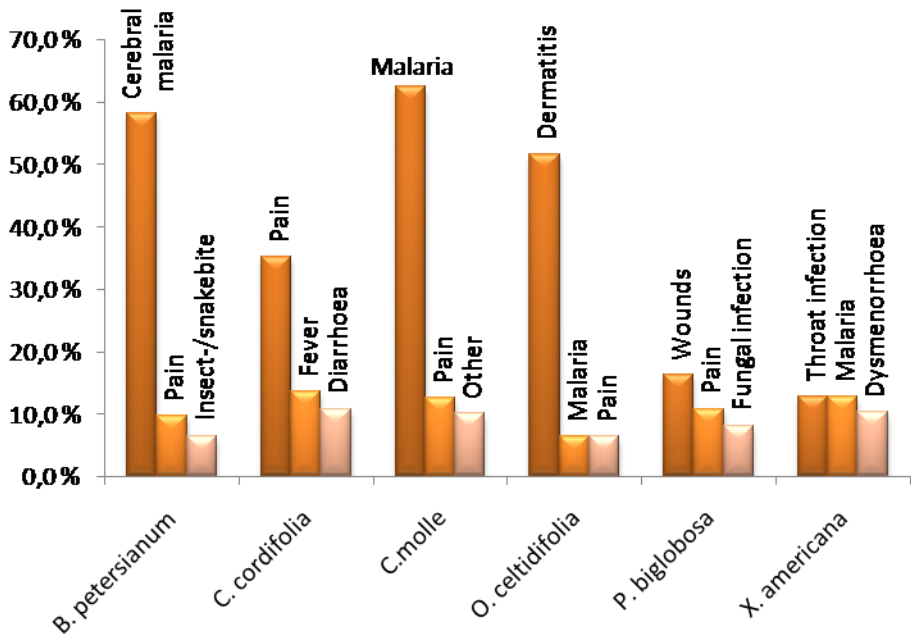

Supplement: MOESM2 [file 9627220]
